# Supplementary material for: Characterization of an International High-Risk Escherichia coli ST410 Clone Coproducing NDM-5 and OXA-181 in a Food Market in China
Source: PubMed Central journal article supplement (PMC10269901; doi:10.1128/spectrum.04727-22), 2023-05-11
Supplement: spectrum.04727-22-s0002.pdf [file spectrum.04727-22-s0002.pdf]

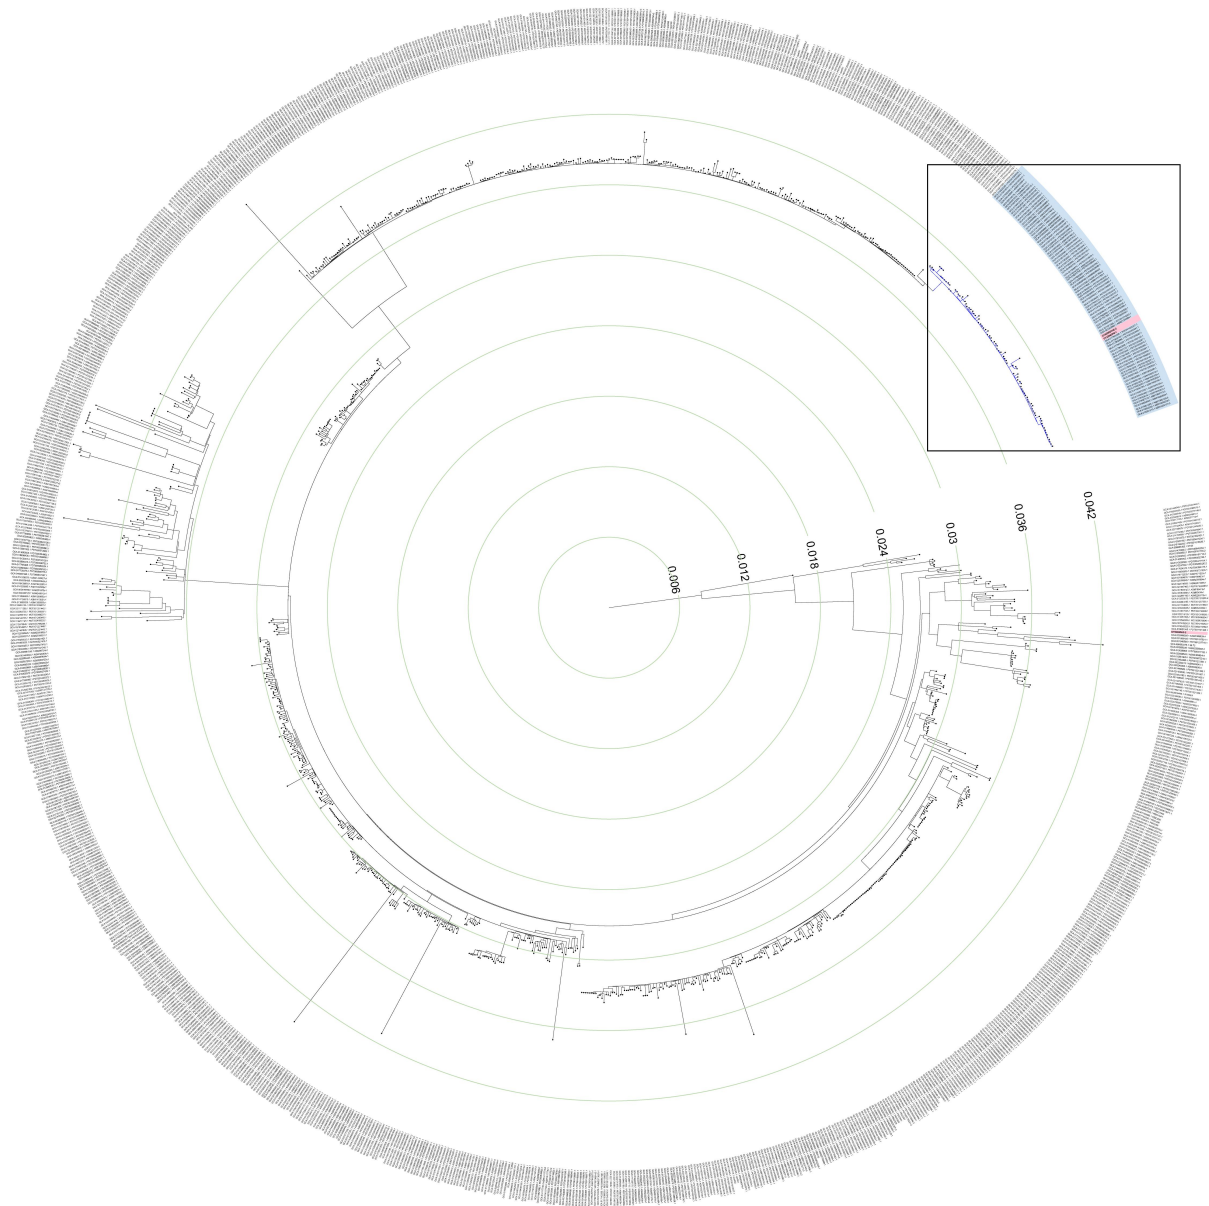

**Fig. S1.** Phylogenetic tree of *E. coli* ST410 isolates from this study and GenBank (n=1184).

Three ST410 isolates characterized in the present study are shaded in pink. GYX208DH4E-2, GYX208DH6-1 and 87 GenBank isolates are clustered into a blue branch.
